# Supplementary material
Source: PubMed Central journal article supplement (PMC5961388)
Supplement: DC171981SupplementaryData.pdf [file DC171981SupplementaryData.pdf]

## SUPPLEMENTARY DATA

### Supplementary Appendix for Food Insecurity, Food ‘Deserts’, and Glycemic Control in Diabetes Patients: a Longitudinal Analysis

#### Technical Appendix

We followed established best practices for multi-level model building.(1) We fit models using maximum likelihood estimation via PROC MIXED in SAS version 9.4. An important part of building multi-level models is selecting the appropriate covariance structure. In this case, based on subject matter knowledge, we suspected that an autoregressive covariance structure would be appropriate, as the outcome was hemoglobin A1c values. Since these values changes slowly over a period of approximately 3 months, the results are likely to be more similar when measured closer together in time than when measured further apart. We confirmed this by examining the Akaike information criterion and the Bayes information criterion, finding that an autoregressive correlation structure minimized the values compared with other correlation structures (variance components, unstructured, or compound symmetry).

To calculate intraclass correlations (ICC), we followed the recommendations of Bell et al, and fit null (intercept only) models.(1) The ICCs were then calculated as:

$$\text{ICC}_{\text{census tract}} = \sigma^2_{\text{census tract}} / (\sigma^2_{\text{census tract}} + \sigma^2_{\text{individual}} + \sigma^2_{\text{residual}})$$
$$\text{ICC}_{\text{individual}} = \sigma^2_{\text{individual}} / (\sigma^2_{\text{census tract}} + \sigma^2_{\text{individual}} + \sigma^2_{\text{residual}})$$

We also examined whether it was necessary to account for within clinic clustering for the patients. To do this, we calculated intraclass correlation coefficients in null models in which hemoglobin a1c observations were clustered within patients, who were clustered within clinics. In these models, clinic explained only 2% of variation in hemoglobin a1c. Most guidelines call for accounting for clustering when the percentage of variation explained is above 5 or 10%, so we did not include a clinic level random effects term in our models.

To allow for a flexible functional form in our models for the relationship between time and age with hemoglobin a1c, we modeled these factors with cubic polynomials (time) and quadratic polynomials (age). We ultimately removed these higher order terms, however, as they did not add explanatory power to the model. We also used random slopes for time, food insecurity, and food access, to allow the change in hemoglobin a1c over time to vary between these groups.

Using the notation that t = measurement time, l = the individual, and j = the census tract, in general our models followed the form:

$$\begin{aligned} \text{Level 1 [HbA1c Measurement Occasion]:} & \quad y_{tij} = \beta_{0ij} + \beta_{1ij}(\text{Time}_{tij}) + e_{tij} \\ \text{Level 2 [Individual]:} & \quad \beta_{0ij} = \delta_{0j} + U_{0ij} \\ & \quad \beta_{1ij}[\text{food insecurity}] = \delta_{1j} + U_{1ij} \\ \text{Level 3 [Census tract]:} & \quad \delta_{0j} = \gamma_{000} + V_{00j} \\ & \quad \delta_{1j}[\text{food access}] = \gamma_{100} + V_{10j} \end{aligned}$$

This yields a general composite equation of  $Y_{tij} = (\gamma_{000} + V_{00j} + U_{0ij}) + (\gamma_{100} + V_{10j} + U_{1ij})(\text{Time}_{tij}) + e_{tij}$

The key coefficients in the model were a term for the exposure of interest (either food insecurity status [1/0] or living in an area with poor food access [1/0]), a term for months of time since baseline, and an interaction (product) term for the exposure\*time. The remaining factors listed in the full models were included to adjust for possible confounding. We did not use any time-lagged variables. Level 2 of the model had a random intercept term and a random slope term for food insecurity. Level 3 of the model had a random intercept term and a random slope term for food access.

## SUPPLEMENTARY DATA

### References

1. Bell BA, Ene M, Smiley W, Schoeneberger JA. A Multilevel Model Primer Using SAS® PROC MIXED (Paper 433-2013) [Internet]. SAS Global Forum 2013; [cited 2017 Aug 11]. Available from: <http://support.sas.com/resources/papers/proceedings13/433-2013.pdf>

**Supplementary Table 1.** Demographics and clinical characteristics of those who could and could not be geocoded to establish physical food access

|                                 | Not Geocoded<br>N=20 | Geocoded<br>N=391 | P    |
|---------------------------------|----------------------|-------------------|------|
|                                 | % or mean (SD)       | % or mean (SD)    |      |
| Food Insecure                   | 10.00                | 20.21             | 0.39 |
| Age, y                          | 63.65                | 61.94             | 0.59 |
| Female                          | 35.00                | 48.08             | 0.36 |
| Race/Ethnicity                  |                      |                   | 0.59 |
| Non-Hispanic White              | 70.00                | 79.03             |      |
| Non-Hispanic Black              | 10.00                | 7.67              |      |
| Hispanic                        | 15.00                | 8.95              |      |
| Asian/Other/Multi               | 5.00                 | 4.35              |      |
| Education                       |                      |                   | 0.80 |
| < High School Diploma           | 15.00                | 14.36             |      |
| High School Diploma             | 20.00                | 27.18             |      |
| > High School Diploma           | 65.00                | 58.46             |      |
| Insurance                       |                      |                   | 0.83 |
| Private                         | 45.00                | 50.94             |      |
| Medicare                        | 35.00                | 26.42             |      |
| Medicaid                        | 10.00                | 13.48             |      |
| Uninsured/Self-Pay              | 10.00                | 9.16              |      |
| Born Outside U.S.               | 30.00                | 20.00             | 0.27 |
| Low Health Literacy             | 40.00                | 27.58             | 0.31 |
| Took Survey in Spanish          | 5.00                 | 5.12              | 1.00 |
| Age at Diabetes Diagnosis,<br>y | 53.50                | 49.74             | 0.32 |
| Charlson Score                  | 5.15                 | 4.85              | 0.68 |
| Insulin Use                     | 35.00                | 53.96             | 0.11 |
| Statin Use                      | 90.00                | 83.38             | 0.75 |
| ACEi/ARB Use                    | 85.00                | 81.33             | 1.00 |

P values for categorical variables from Fisher's exact test given small sample size. Abbreviations: ACEi = angiotensin converting enzyme inhibitor; ARB = angiotensin receptor blocker

SUPPLEMENTARY DATA

**Supplementary Table 2.** Full Models for Food Insecurity and Low Physical Food Access (1 and 10 Definition)

|                                          | $\beta$                 | p-value  | Lower 95% Confidence Interval | Upper 95% Confidence Interval |
|------------------------------------------|-------------------------|----------|-------------------------------|-------------------------------|
| Food Insecure                            | 0.5566                  | <.0001   | 0.3560                        | 0.7573                        |
| Time                                     | 0.0033                  | 0.1139   | -0.0008                       | 0.0073                        |
| Food Insecure*Time                       | -0.0030                 | 0.5029   | -0.0119                       | 0.0059                        |
| Age                                      | 0.0366                  | 0.1758   | -0.0164                       | 0.0896                        |
| Age, squared                             | -0.0004                 | 0.0537   | -0.0009                       | 0.0000                        |
| Female                                   | -0.0982                 | 0.1885   | -0.2445                       | 0.0482                        |
| Race/Ethnicity                           |                         |          |                               |                               |
| Non-Hispanic White                       | -0.7673                 | 0.0003   | -1.1869                       | -0.3476                       |
| Non-Hispanic Black                       | -0.6775                 | <.0001   | -1.0080                       | -0.3469                       |
| Hispanic                                 | -0.4204                 | 0.0358   | -0.8129                       | -0.0279                       |
| Asian/Other/Multi                        | Referent                | n/a      | n/a                           | n/a                           |
| Education                                |                         |          |                               |                               |
| < High School Diploma                    | 0.1354                  | 0.2899   | -0.1154                       | 0.3863                        |
| High School Diploma                      | -0.1948                 | 0.0263   | -0.3666                       | -0.0230                       |
| > High School Diploma                    | Referent                | n/a      | n/a                           | n/a                           |
| Insurance                                |                         |          |                               |                               |
| Private                                  | 0.2592                  | 0.0577   | -0.0085                       | 0.5269                        |
| Medicare                                 | -0.1594                 | 0.1229   | -0.3619                       | 0.0431                        |
| Medicaid                                 | 0.0961                  | 0.4477   | -0.1521                       | 0.3443                        |
| Uninsured/Self-Pay                       | Referent                | n/a      | n/a                           | n/a                           |
| Adequate Health Literacy                 | -0.0618                 | 0.5135   | -0.2472                       | 0.1236                        |
| Took Survey in English                   | -0.3835                 | 0.1140   | -0.8592                       | 0.0922                        |
| Age at Diabetes Diagnosis, y             | -0.0131                 | 0.0031   | -0.0218                       | -0.0044                       |
| Charlson Score                           | -0.0181                 | 0.1964   | -0.0456                       | 0.0094                        |
| No Insulin Use                           | -0.7909                 | <.0001   | -0.9686                       | -0.6133                       |
| No Statin Use                            | -0.2689                 | 0.0121   | -0.4788                       | -0.0590                       |
| Low physical food access, 1 and 10       | 0.0930                  | 0.5453   | -0.2096                       | 0.3957                        |
| Low Vehicle Access                       | -0.1584                 | 0.2987   | -0.4581                       | 0.1412                        |
| Median Family Income of Census Tract, \$ | 0.0000                  | 0.2439   | 0.0000                        | 0.0000                        |
| Census Tract Poverty Rate                | 0.0115                  | 0.2097   | -0.0065                       | 0.0296                        |
| Outpatient Visits during Study, count    | -0.0057                 | <.0001   | -0.0076                       | -0.0038                       |
|                                          |                         |          |                               |                               |
| Covariance Parameter Estimates           |                         |          |                               |                               |
| Covariance Parameter                     | Level                   | Estimate | P                             |                               |
| <b>Variance</b>                          | <b>CensusTract</b>      | 0.4281   | <.0001                        |                               |
| <b>AR(1)</b>                             | <b>CensusTract</b>      | -0.1358  | 0.4569                        |                               |
| <b>Variance</b>                          | <b>mrn(CensusTract)</b> | 0.0008   | <.0001                        |                               |
| <b>AR(1)</b>                             | <b>mrn(CensusTract)</b> | 1.0000   | .                             |                               |
| <b>Residual</b>                          |                         | 0.7708   | <.0001                        |                               |

SUPPLEMENTARY DATA

**Supplementary Table 3.** Full Models for Food Insecurity and Low Physical Food Access (1 and 10 Definition), Food Access by Time Interaction

|                                          | $\beta$                 | p-value  | Lower 95% Confidence Interval | Upper 95% Confidence Interval |
|------------------------------------------|-------------------------|----------|-------------------------------|-------------------------------|
| Food Insecure                            | 0.5363                  | <.0001   | 0.3393                        | 0.7333                        |
| Time                                     | 0.0046                  | 0.0309   | 0.0004                        | 0.0088                        |
| Age                                      | 0.0361                  | 0.1813   | -0.0168                       | 0.0890                        |
| Age, squared                             | -0.0004                 | 0.0562   | -0.0008                       | 0.0000                        |
| Female                                   | -0.0951                 | 0.2072   | -0.2442                       | 0.0541                        |
| Race/Ethnicity                           |                         |          |                               |                               |
| Non-Hispanic White                       | -0.7684                 | 0.0010   | -1.2029                       | -0.3339                       |
| Non-Hispanic Black                       | -0.6787                 | 0.0003   | -1.0209                       | -0.3365                       |
| Hispanic                                 | -0.4186                 | 0.0438   | -0.8249                       | -0.0124                       |
| Asian/Other/Multi                        | Referent                | n/a      | n/a                           | n/a                           |
| Education                                |                         |          |                               |                               |
| < High School Diploma                    | 0.1308                  | 0.3095   | -0.1241                       | 0.3857                        |
| High School Diploma                      | -0.1934                 | 0.0305   | -0.3680                       | -0.0188                       |
| > High School Diploma                    | Referent                | n/a      | n/a                           | n/a                           |
| Insurance                                |                         |          |                               |                               |
| Private                                  | 0.2536                  | 0.0664   | -0.0175                       | 0.5247                        |
| Medicare                                 | -0.1607                 | 0.1231   | -0.3658                       | 0.0445                        |
| Medicaid                                 | 0.0926                  | 0.4660   | -0.1588                       | 0.3440                        |
| Uninsured/Self-Pay                       | Referent                | n/a      | n/a                           | n/a                           |
| Adequate Health Literacy                 | -0.0618                 | 0.5175   | -0.2537                       | 0.1302                        |
| Took Survey in English                   | -0.3893                 | 0.1366   | -0.9228                       | 0.1442                        |
| Age at Diabetes Diagnosis, y             | -0.0132                 | 0.0028   | -0.0219                       | -0.0046                       |
| Charlson Score                           | -0.0179                 | 0.2020   | -0.0453                       | 0.0096                        |
| No Insulin Use                           | -0.7893                 | <.0001   | -0.9712                       | -0.6074                       |
| No Statin Use                            | -0.2707                 | 0.0171   | -0.4894                       | -0.0519                       |
| Low physical food access, 1 and 10       | 0.1547                  | 0.3270   | -0.1555                       | 0.4649                        |
| Low food access*Time                     | -0.0075                 | 0.0728   | -0.0156                       | 0.0007                        |
| Low Vehicle Access                       | -0.1586                 | 0.2984   | -0.4584                       | 0.1412                        |
| Median Family Income of Census Tract, \$ | 0.0000                  | 0.2435   | 0.0000                        | 0.0000                        |
| Census Tract Poverty Rate                | 0.0115                  | 0.2109   | -0.0065                       | 0.0295                        |
| Outpatient Visits during Study, count    | -0.0057                 | <.0001   | -0.0076                       | -0.0038                       |
|                                          |                         |          |                               |                               |
| Covariance Parameter Estimates           |                         |          |                               |                               |
| Covariance Parameter                     | Level                   | Estimate | P                             |                               |
| <b>Variance</b>                          | <b>CensusTract</b>      | 0.4295   | <.0001                        |                               |
| <b>AR(1)</b>                             | <b>CensusTract</b>      | -0.1333  | 0.4670                        |                               |
| <b>Variance</b>                          | <b>mrn(CensusTract)</b> | 0.0008   | <.0001                        |                               |
| <b>AR(1)</b>                             | <b>mrn(CensusTract)</b> | 1.0000   | .                             |                               |
| <b>Residual</b>                          |                         | 0.7706   | <.0001                        |                               |

SUPPLEMENTARY DATA

**Supplementary Table 4.** Full Models for Food Insecurity and Low Physical Food Access (Modified Retail Food Environment Index Definition)

|                                          | $\beta$                 | p-value  | Lower 95% Confidence Interval | Upper 95% Confidence Interval |
|------------------------------------------|-------------------------|----------|-------------------------------|-------------------------------|
| Food Insecure                            | 0.7882                  | <.0001   | 0.5248                        | 1.0515                        |
| Time                                     | 0.0031                  | 0.1755   | -0.0014                       | 0.0077                        |
| Food Insecure*Time                       | -0.0041                 | 0.4571   | -0.0148                       | 0.0067                        |
| Age                                      | 0.0294                  | 0.3873   | -0.0373                       | 0.0960                        |
| Age, squared                             | -0.0004                 | 0.1229   | -0.0010                       | 0.0001                        |
| Female                                   | -0.0403                 | 0.6558   | -0.2178                       | 0.1371                        |
| Race/Ethnicity                           |                         |          |                               |                               |
| Non-Hispanic White                       | -0.6524                 | 0.0061   | -1.1181                       | -0.1867                       |
| Non-Hispanic Black                       | -0.6617                 | 0.0015   | -1.0689                       | -0.2544                       |
| Hispanic                                 | 0.0944                  | 0.7134   | -0.4096                       | 0.5984                        |
| Asian/Other/Multi                        | Referent                | n/a      | n/a                           | n/a                           |
| Education                                |                         |          |                               |                               |
| < High School Diploma                    | 0.3798                  | 0.0126   | 0.0817                        | 0.6779                        |
| High School Diploma                      | -0.3260                 | 0.0027   | -0.5386                       | -0.1135                       |
| > High School Diploma                    | Referent                | n/a      | n/a                           | n/a                           |
| Insurance                                |                         |          |                               |                               |
| Private                                  | 0.4610                  | 0.0062   | 0.1314                        | 0.7907                        |
| Medicare                                 | -0.1312                 | 0.3110   | -0.3852                       | 0.1228                        |
| Medicaid                                 | -0.1982                 | 0.2175   | -0.5133                       | 0.1170                        |
| Uninsured/Self-Pay                       | Referent                | n/a      | n/a                           | n/a                           |
| Adequate Health Literacy                 | -0.0551                 | 0.6418   | -0.2876                       | 0.1773                        |
| Took Survey in English                   | 0.2899                  | 0.3419   | -0.3082                       | 0.8879                        |
| Age at Diabetes Diagnosis, y             | -0.0060                 | 0.2621   | -0.0165                       | 0.0045                        |
| Charlson Score                           | -0.0164                 | 0.3133   | -0.0483                       | 0.0155                        |
| No Insulin Use                           | -0.9880                 | <.0001   | -1.1960                       | -0.7799                       |
| No Statin Use                            | 0.0418                  | 0.7435   | -0.2090                       | 0.2927                        |
| MRFEI                                    | -0.0065                 | 0.5565   | -0.0283                       | 0.0153                        |
| Low Vehicle Access                       | 0.0035                  | 0.9839   | -0.3350                       | 0.3419                        |
| Median Family Income of Census Tract, \$ | 0.0000                  | 0.5689   | 0.0000                        | 0.0000                        |
| Census Tract Poverty Rate                | -0.0015                 | 0.9005   | -0.0250                       | 0.0220                        |
| Outpatient Visits during Study, count    | -0.0042                 | 0.0004   | -0.0066                       | -0.0019                       |
|                                          |                         |          |                               |                               |
| Covariance Parameter Estimates           |                         |          |                               |                               |
| Covariance Parameter                     | Level                   | Estimate | P                             |                               |
| <b>Variance</b>                          | <b>CensusTract</b>      | 0.8206   | <.0001                        |                               |
| <b>AR(1)</b>                             | <b>CensusTract</b>      | 0.0000   | .                             |                               |
| <b>Variance</b>                          | <b>mrn(CensusTract)</b> | 0.0008   | <.0001                        |                               |
| <b>AR(1)</b>                             | <b>mrn(CensusTract)</b> | 1.0000   | .                             |                               |
| <b>Residual</b>                          |                         | 0.7479   | <.0001                        |                               |

SUPPLEMENTARY DATA

**Supplementary Table 5.** Full Models for Food Insecurity and Low Physical Food Access (1/2 and 10 Definition)

|                                          | $\beta$                 | p-value  | Lower 95% Confidence Interval | Upper 95% Confidence Interval |
|------------------------------------------|-------------------------|----------|-------------------------------|-------------------------------|
| Food Insecure                            | 0.5591                  | <.0001   | 0.3586                        | 0.7597                        |
| Time                                     | 0.0033                  | 0.1156   | -0.0008                       | 0.0073                        |
| Food Insecure*Time                       | -0.0031                 | 0.5003   | -0.0120                       | 0.0058                        |
| Age                                      | 0.0362                  | 0.1806   | -0.0168                       | 0.0893                        |
| Age, squared                             | -0.0004                 | 0.0572   | -0.0008                       | 0.0000                        |
| Female                                   | -0.0997                 | 0.1822   | -0.2462                       | 0.0468                        |
| Race/Ethnicity                           |                         |          |                               |                               |
| Non-Hispanic White                       | -0.7804                 | 0.0003   | -1.2003                       | -0.3605                       |
| Non-Hispanic Black                       | -0.6744                 | <.0001   | -1.0034                       | -0.3453                       |
| Hispanic                                 | -0.4329                 | 0.0306   | -0.8254                       | -0.0405                       |
| Asian/Other/Multi                        | Referent                | n/a      | n/a                           | n/a                           |
| Education                                |                         |          |                               |                               |
| < High School Diploma                    | 0.1296                  | 0.3098   | -0.1206                       | 0.3798                        |
| High School Diploma                      | -0.1982                 | 0.0237   | -0.3699                       | -0.0265                       |
| > High School Diploma                    | Referent                | n/a      | n/a                           | n/a                           |
| Insurance                                |                         |          |                               |                               |
| Private                                  | 0.2602                  | 0.0564   | -0.0071                       | 0.5276                        |
| Medicare                                 | -0.1568                 | 0.1294   | -0.3595                       | 0.0459                        |
| Medicaid                                 | 0.0966                  | 0.4456   | -0.1517                       | 0.3448                        |
| Uninsured/Self-Pay                       | Referent                | n/a      | n/a                           | n/a                           |
| Adequate Health Literacy                 | -0.0624                 | 0.5095   | -0.2478                       | 0.1231                        |
| Took Survey in English                   | -0.3980                 | 0.1006   | -0.8731                       | 0.0772                        |
| Age at Diabetes Diagnosis, y             | -0.0133                 | 0.0028   | -0.0220                       | -0.0046                       |
| Charlson Score                           | -0.0187                 | 0.1821   | -0.0461                       | 0.0088                        |
| No Insulin Use                           | -0.7891                 | <.0001   | -0.9670                       | -0.6111                       |
| No Statin Use                            | -0.2661                 | 0.0131   | -0.4762                       | -0.0560                       |
| Low physical food access, 1/2 and 10     | -0.0189                 | 0.9143   | -0.3641                       | 0.3264                        |
| Low Vehicle Access                       | -0.1339                 | 0.4260   | -0.4647                       | 0.1969                        |
| Median Family Income of Census Tract, \$ | 0.0000                  | 0.2479   | 0.0000                        | 0.0000                        |
| Census Tract Poverty Rate                | 0.0092                  | 0.3152   | -0.0088                       | 0.0273                        |
| Outpatient Visits during Study, count    | -0.0057                 | <.0001   | -0.0076                       | -0.0038                       |
|                                          |                         |          |                               |                               |
| Covariance Parameter Estimates           |                         |          |                               |                               |
| Covariance Parameter                     | Level                   | Estimate | P                             |                               |
| <b>Variance</b>                          | <b>CensusTract</b>      | 0.2060   | <.0001                        |                               |
| <b>AR(1)</b>                             | <b>CensusTract</b>      | 1.0000   | .                             |                               |
| <b>Variance</b>                          | <b>mrn(CensusTract)</b> | 0.0008   | <.0001                        |                               |
| <b>AR(1)</b>                             | <b>mrn(CensusTract)</b> | 1.0000   | .                             |                               |
| <b>Residual</b>                          |                         | 0.7708   | <.0001                        |                               |

SUPPLEMENTARY DATA

**Supplementary Table 6.** Full Models for Food Insecurity and Low Income Plus Low Physical Food Access (1 and 10 Definition)

|                                          | $\beta$                 | p-value  | Lower 95% Confidence Interval | Upper 95% Confidence Interval |
|------------------------------------------|-------------------------|----------|-------------------------------|-------------------------------|
| Food Insecure                            | 0.5724                  | <.0001   | 0.3722                        | 0.7726                        |
| Time                                     | 0.0033                  | 0.1079   | -0.0007                       | 0.0074                        |
| Food Insecure*Time                       | -0.0031                 | 0.5010   | -0.0119                       | 0.0058                        |
| Age                                      | 0.0368                  | 0.1744   | -0.0163                       | 0.0898                        |
| Age, squared                             | -0.0004                 | 0.0518   | -0.0009                       | 0.0000                        |
| Female                                   | -0.0932                 | 0.2118   | -0.2396                       | 0.0532                        |
| Race/Ethnicity                           |                         |          |                               |                               |
| Non-Hispanic White                       | -0.7878                 | 0.0002   | -1.2079                       | -0.3677                       |
| Non-Hispanic Black                       | -0.6105                 | 0.0002   | -0.9353                       | -0.2857                       |
| Hispanic                                 | -0.3942                 | 0.0488   | -0.7863                       | -0.0021                       |
| Asian/Other/Multi                        | Referent                | n/a      | n/a                           | n/a                           |
| Education                                |                         |          |                               |                               |
| < High School Diploma                    | 0.1547                  | 0.2266   | -0.0961                       | 0.4055                        |
| High School Diploma                      | -0.1774                 | 0.0413   | -0.3478                       | -0.0070                       |
| > High School Diploma                    | Referent                | n/a      | n/a                           | n/a                           |
| Insurance                                |                         |          |                               |                               |
| Private                                  | 0.2631                  | 0.0543   | -0.0049                       | 0.5311                        |
| Medicare                                 | -0.1557                 | 0.1328   | -0.3589                       | 0.0474                        |
| Medicaid                                 | 0.0999                  | 0.4311   | -0.1489                       | 0.3487                        |
| Uninsured/Self-Pay                       | Referent                | n/a      | n/a                           | n/a                           |
| Adequate Health Literacy                 | -0.0484                 | 0.6084   | -0.2337                       | 0.1369                        |
| Took Survey in English                   | -0.3983                 | 0.1012   | -0.8747                       | 0.0781                        |
| Age at Diabetes Diagnosis, y             | -0.0134                 | 0.0027   | -0.0221                       | -0.0046                       |
| Charlson Score                           | -0.0189                 | 0.1770   | -0.0464                       | 0.0086                        |
| No Insulin Use                           | -0.7946                 | <.0001   | -0.9729                       | -0.6164                       |
| No Statin Use                            | -0.2737                 | 0.0108   | -0.4840                       | -0.0634                       |
| Low Income and Low Food Access, 1 and 10 | 0.3125                  | 0.3460   | -0.3418                       | 0.9667                        |
| Low Vehicle Access                       | -0.1346                 | 0.3854   | -0.4396                       | 0.1703                        |
| Outpatient Visits during Study, count    | -0.0056                 | <.0001   | -0.0075                       | -0.0037                       |
|                                          |                         |          |                               |                               |
| Covariance Parameter Estimates           |                         |          |                               |                               |
| Covariance Parameter                     | Level                   | Estimate | P                             |                               |
| <b>Variance</b>                          | <b>CensusTract</b>      | 0.8944   | <.0001                        |                               |
| <b>AR(1)</b>                             | <b>CensusTract</b>      | -0.5789  | <.0001                        |                               |
| <b>Variance</b>                          | <b>mrn(CensusTract)</b> | 0.0008   | <.0001                        |                               |
| <b>AR(1)</b>                             | <b>mrn(CensusTract)</b> | 1.0000   | .                             |                               |
| <b>Residual</b>                          |                         | 0.7709   | <.0001                        |                               |

SUPPLEMENTARY DATA

**Supplementary Table 7.** Distribution of outpatient visit and hemoglobin A1c assessment frequency

|                                                            | Food Secure,<br>% | Food<br>Insecure, % | P      | Adequate<br>Food Access,<br>% | Low Food<br>Access, % | P      |
|------------------------------------------------------------|-------------------|---------------------|--------|-------------------------------|-----------------------|--------|
| Outpatient<br>visits during<br>study period                |                   |                     | 0.3391 |                               |                       | 0.2117 |
| 0                                                          | 2.15              | 0.00                |        | 1.48                          | 1.68                  |        |
| 1                                                          | 0.31              | 1.25                |        | 0.37                          | 0.84                  |        |
| 2                                                          | 0.31              | 1.25                |        | 0.74                          | 0.00                  |        |
| 3-4                                                        | 0.62              | 0.00                |        | 0.00                          | 1.68                  |        |
| 5+                                                         | 96.62             | 97.50               |        | 97.42                         | 95.80                 |        |
| Hemoglobin<br>A1c<br>assessments<br>during study<br>period |                   |                     | 0.5446 |                               |                       | 0.2056 |
| 0                                                          | 0.00              | 0.00                |        | 0.00                          | 0.00                  |        |
| 1                                                          | 2.46              | 0.00                |        | 1.48                          | 2.52                  |        |
| 2                                                          | 0.92              | 1.25                |        | 0.37                          | 2.52                  |        |
| 3-4                                                        | 4.31              | 3.75                |        | 4.06                          | 5.04                  |        |
| 5+                                                         | 92.31             | 95.00               |        | 94.10                         | 89.92                 |        |



SUPPLEMENTARY DATA

**Supplementary Table 8.** Full Models for Food Insecurity and Low Income Plus Low Physical Food Access (1 and 10 Definition)

|                                          | $\beta$  | p-value | Lower 95% Confidence Interval | Upper 95% Confidence Interval |
|------------------------------------------|----------|---------|-------------------------------|-------------------------------|
| Food Insecure                            | 0.5370   | <.0001  | 0.3476                        | 0.7263                        |
| Age                                      | 0.0356   | 0.1878  | -0.0174                       | 0.0886                        |
| Age, squared                             | -0.0004  | 0.0587  | -0.0008                       | 0.0000                        |
| Female                                   | -0.0981  | 0.1886  | -0.2444                       | 0.0482                        |
| Race/Ethnicity                           |          |         |                               |                               |
| Non-Hispanic White                       | -0.7732  | 0.0003  | -1.1930                       | -0.3534                       |
| Non-Hispanic Black                       | -0.6761  | <.0001  | -1.0067                       | -0.3456                       |
| Hispanic                                 | -0.4160  | 0.0377  | -0.8083                       | -0.0237                       |
| Asian/Other/Multi                        | Referent | n/a     | n/a                           | n/a                           |
| Education                                |          |         |                               |                               |
| < High School Diploma                    | 0.1294   | 0.3395  | -0.1362                       | 0.3949                        |
| High School Diploma                      | -0.2269  | 0.0151  | -0.4098                       | -0.0439                       |
| > High School Diploma                    | Referent | n/a     | n/a                           | n/a                           |
| Education*Time Interaction               |          |         |                               |                               |
| < High School Diploma*Time               | 0.0008   | 0.8863  | -0.0098                       | 0.0114                        |
| High School Diploma*Time                 | 0.0044   | 0.3013  | -0.0039                       | 0.0127                        |
| > High School Diploma*Time               | Referent | n/a     | n/a                           | n/a                           |
| Insurance                                |          |         |                               |                               |
| Private                                  | 0.2556   | 0.0612  | -0.0120                       | 0.5233                        |
| Medicare                                 | -0.1605  | 0.1203  | -0.3630                       | 0.0420                        |
| Medicaid                                 | 0.0926   | 0.4645  | -0.1557                       | 0.3410                        |
| Uninsured/Self-Pay                       | Referent | n/a     | n/a                           | n/a                           |
| Adequate Health Literacy                 | -0.0615  | 0.5152  | -0.2469                       | 0.1239                        |
| Took Survey in English                   | -0.3821  | 0.1153  | -0.8578                       | 0.0936                        |
| Age at Diabetes Diagnosis, y             | -0.0131  | 0.0031  | -0.0218                       | -0.0045                       |
| Charlson Score                           | -0.0180  | 0.1987  | -0.0455                       | 0.0095                        |
| No Insulin Use                           | -0.7920  | <.0001  | -0.9696                       | -0.6143                       |
| No Statin Use                            | -0.2711  | 0.0114  | -0.4810                       | -0.0612                       |
| Low Income and Low Food Access, 1 and 10 | 0.0942   | 0.5405  | -0.2087                       | 0.3971                        |
| Low Vehicle Access                       | -0.1571  | 0.3030  | -0.4570                       | 0.1427                        |
| Outpatient Visits during Study, count    | 0.0000   | 0.2508  | 0.0000                        | 0.0000                        |

SUPPLEMENTARY DATA

**Supplementary Table 9.** Hemoglobin A1c by food insecurity and food access in sequential models

|                                              | Mean Hemoglobin A1c, % | 95% CI     | Difference | p      | Change in difference per month | 95%CI           | p    |
|----------------------------------------------|------------------------|------------|------------|--------|--------------------------------|-----------------|------|
| <b>Model A: Exposure and time only model</b> |                        |            |            |        |                                |                 |      |
| Food Insecure                                | 7.8                    | 7.7 to 7.9 | 0.5        | <.0001 | -0.003                         | -0.01 to 0.005  | 0.43 |
| Food Secure                                  | 7.4                    | 7.3 to 7.4 |            |        |                                |                 |      |
| Low Food Access                              | 7.3                    | 7.2 to 7.3 | -0.3       | 0.04   | -0.003                         | -0.01 to 0.005  | 0.48 |
| Adequate Food Access                         | 7.5                    | 7.5 to 7.6 |            |        |                                |                 |      |
| <b>Model B: Demographic covariate model</b>  |                        |            |            |        |                                |                 |      |
| Food Insecure                                | 7.7                    | 7.5 to 7.8 | 0.3        | 0.005  | -0.001                         | -0.008 to 0.006 | 0.79 |
| Food Secure                                  | 7.4                    | 7.2 to 7.5 |            |        |                                |                 |      |
| Low Food Access                              | 7.3                    | 7.1 to 7.5 | -0.2       | 0.46   | -0.004                         | -0.01 to 0.003  | 0.27 |
| Adequate Food Access                         | 7.5                    | 7.4 to 7.6 |            |        |                                |                 |      |
| <b>Model C: Clinical covariate model</b>     |                        |            |            |        |                                |                 |      |
| Food Insecure                                | 7.5                    | 7.4 to 7.7 | 0.4        | <.0001 | -0.0004                        | -0.007 to 0.007 | 0.91 |
| Food Secure                                  | 7.1                    | 7.0 to 7.3 |            |        |                                |                 |      |
| Low Food Access                              | 7.1                    | 6.9 to 7.3 | -0.2       | 0.47   | -0.005                         | -0.01 to 0.001  | 0.12 |
| Adequate Food Access                         | 7.3                    | 7.3 to 7.4 |            |        |                                |                 |      |
| <b>Model D: Full multilevel model</b>        |                        |            |            |        |                                |                 |      |
| Food Insecure                                | 7.6                    | 7.2 to 7.9 | 0.5        | <.0001 | -0.003                         | -0.01 to 0.01   | 0.50 |
| Food Secure                                  | 7.1                    | 6.8 to 7.3 |            |        |                                |                 |      |
| Low Food Access                              | 7.3                    | 6.9 to 7.6 | -0.04      | 0.33   | -0.007                         | -0.02 to 0.001  | 0.07 |
| Adequate Food Access                         | 7.3                    | 7.0 to 7.6 |            |        |                                |                 |      |

Food access defined using the 1 mile in urban areas and 10 miles in rural areas definition; mean hemoglobin A1c, and the difference in mean hemoglobin A1c was calculated using least squares means. \*Model A includes only food security or food access, time, and their interaction. Model B adds age, age squared, gender, race/ethnicity, education, insurance, health literacy, and language to model A. Model C adds age at diabetes diagnosis, baseline Charlson comorbidity score, insulin use, statin use, and number of outpatient visits to model B. Model D adds median family income, poverty rate, and vehicle access, along with random effects for repeated measures within individuals and within census tracts, to model C. Model D results are also presented in Table 2 of the main manuscript.
